# Supplementary material for: Proteomic Response of Sugar Beet Monosomic Addition Line M14 Guard Cells to Salt Stress
Source: Research Square preprint supplement (doi:10.21203/rs.3.rs-1025655/v1), 2022-03-08
Supplement: Supplementary file 1 [file 9f9a4aeb1ed9d2b826d7a3d0.xlsx]

## Sheet: Sheet1
Accession	Protein name	Fold changed
		200 mM/	400 mM/
		control	control
A0A0K9Q7J0	Peroxidase	0.767303	\
B9SKL8	Cucumisin	0.740636	\
A0A0K9RYN2	Succinate--CoA ligase [ADP-forming] subunit beta	1.39398	\
A0A2G9I134	Putative dehydrogenase	0.690575	\
A0A0K9R973	ATP-dependent Clp protease proteolytic subunit	0.659454	\
A0A2K2A8I6	Aspartate aminotransferase	1.52401	\
A0A1J6KCB1	Sulfate adenylyltransferase	1.3949	\
A0A251RA70	Aspartate aminotransferase	1.50082	\
Q5U6C7	Cytochrome c oxidase subunit 2	0.671757	\
A0A0K9QBF9	Peroxidase	0.665692	\
A0A1U8PLA8	glucose-induced degradation protein 8 homolog	1.67374	\
P10871	Ribulose bisphosphate carboxylase/oxygenase activase	\	0.723882
A0A1S4BC76	glycine-rich cell wall structural protein-like	\	0.709361
T1YW73	Salinity-induced protein	\	1.26952
Q6NPS8	NADPH-dependent diflavin oxidoreductase 1	\	0.67105
P28644	28 kDa ribonucleoprotein	\	1.3429
A0A200QL97	Prohibitin	\	0.759815
Q9SmL8	Malate dehydrogenase	\	0.659612
W6JNH5	Non-specific lipid-transfer protein	3.21959	\
A0A061G472	ADP-ribosylation factor GTPase-activating protein AGD8	1.23804	\
A0A061FLT1	ARM repeat superfamily protein	0.761509	\
I3XHK4	Translocase of chloroplast	0.787227	\
A0A2P5B4U6	Transmembrane protein	0.678967	\
A0A314UUS8	Mitochondrial import inner membrane translocase subunit TIM22	0.800776	\
W6JNH5	Non-specific lipid-transfer protein	\	2.03438
A0A1U8ADE4	Translation initiation factor IF-3	\	0.782897
P82248	50S ribosomal protein L29	\	0.756992
A0A1U8B9J5	glyoxylate/succinic semialdehyde reductase 1	\	0.728207
O49937	50S ribosomal protein L4	0.771104	\
A0A1J6IM89	Succinate dehydrogenase assembly factor 2	1.36857	\
A0A1R3GGP6	Photosystem I PsaN, reaction centre subunit N	1.4962	\
A0A1U8IAK4	glutaredoxin-like isoform X2	0.775161	\
A0A061DKL7	Small ubiquitin-like modifier 1, 1,SUMO1,ATSUMO1	0.742281	\
A0A1S4B938	Nascent polypeptide-associated complex subunit beta	0.554054	\
A0A2R6PMI8	RNA recognition motif domain protein	1.29741	\
A0A2R6R6R8	Natterin-3 like	\	1.33345
A0A0K9RQT5	Polyadenylate-binding protein	\	0.729034
A0A0K9S0K6	Proteasome subunit alpha type	\	0.718444
A0A1S3BRL8	ruBisCO large subunit-binding protein subunit beta,	\	0.77636
P82249	50S ribosomal protein L31	\	0.772451
A0A0K9RNM7	Non-specific lipid-transfer protein	\	1.8742
A0A1U8LXY9	60S acidic ribosomal protein P2A-like	\	0.769663
I6LM00	Metacaspase 8	\	0.799075
P42764	Jasmonate-induced protein homolog	\	0.697285
Q43157	RibuLose-phosphate 3-epimerase	\	0.762282
A0A1U7ZD41	glycine-rich RNA-binding protein RZ1A	\	0.494824
P12301	Oxygen-evolving enhancer protein 3, chloroplastic	1.61193	\
A0A2P6S6T7	Putative EF-hand domain pair protein	1.60229	\
A0A199V117	UPF0603 protein	1.2933	\
A0A2R6P8Y4	Mitochondrial import receptor subunit like	1.43269	\
A0A1S4BF12	glucan endo-1,3-beta-D-glucosidase	\	0.718411
Q0MX58	Putative GTP binding protein	\	0.588006
A0A1U8KK84	glyoxylate/succinic semialdehyde reductase 2, chloroplastic-like	\	0.760374
G7IY05	Eukaryotic translation initiation factor SUI1	\	0.739595
A0A0J8CWY4	Peroxidase	0.737393	\
B9RBC1	Late embryogenesis abundant, putative	1.74964	\
O81603	L-ascorbate peroxidase	1.25243	\
Q0MYQ7	Germin-like protein 2	0.768708	\
Q9FVE4	Dehydroascorbate reductase	1.21565	\
Q949L8	Thaumatin like protein	0.492281	\
A0A1J3CRY3	Protein ASPARTIC PROTEASE IN GUARD CELL 1	0.556938	\
A9XTL8	Fasciclin-like arabinogalactan protein 13	1.34139	\
Q4H1G4	S-adenosylmethionine synthase 1	1.30912	\
A0A0C5AU63	Suaeda glauca jasmonate-induced protein mRNA	0.737192	\
B6V701	Temperature-induced lipocalin	1.2774	\
Q84LL6	Salt tolerance protein 5	1.2084	\
A0A1S4CK96	miracuLin-like	1.29111	\
I7H3Q7	Beta-1,3-glucanase	1.27755	\
Q41374	Cytosolic heat shock 70 protein	1.42171	\
A0A2G2WN30	Wound-induced basic protein	1.31075	\
A0A2P5ERH0	Cysteine rich receptor like kinase	1.58599	\
A0A371IDZ6	Cation/calcium exchanger 5	\	1.38865
M7YAM8	40S ribosomal protein S27	\	0.723245
A0A0K9QBI6	Aminomethyltransferase	\	0.709271
A0A2I4EXV2	CBS domain-containing protein CBSX1	\	1.33072
A0A2I4DQJ7	Proteasome subunit alpha type	\	0.704006
A0A2I4GDW2	basic blue protein-like	\	0.425351
M8BXC8	Pentose-5-phosphate 3-epimerase	\	0.770721
A0A1X9PGV6	Photosystem II CP43 reaction center protein	\	1.38781
A0A061FDN7	50S ribosomal protein L31	\	0.700503
W9RAJ7	Peptidyl-prolyl cis-trans isomerase E	\	1.36927
P48496	Triosephosphate isomerase	\	0.738182
P82193	50S ribosomal protein L6,	0.694601	\
A0A2K3N6T5	Thylakoid lumenal 15 kDa protein 1 chloroplastic-like	1.29738	\
P82180	50S ribosomal protein L9	0.696564	\
A0A1U8ADE4	Translation initiation factor IF-3	0.780624	\
M5XAL4	Elongation factor Tu	1.2218	\
A0A2P6R6S9	Putative transcription factor interactor and reguLator CCHC(Zn) family	0.525101	\
A0A200QHH9	Glutathione S-transferase	1.45375	\
A0A200PQV0	Ubiquitin-associated domain/translation elongation factor EF-Ts	0.789651	\
P82191	50S ribosomal protein L3, chloroplastic	\	0.658174
P27683	50S ribosomal protein L24, chloroplastic	\	0.718944
P42820	Acidic endochitinase SP2	\	1.58226
D9ZJE7	WHY domain class transcription factor	\	0.753557
B2CZA8	Glutamine synthetase	\	0.636075
A0A2I4G624	aminoacyl tRNA synthase complex-interacting multifunctional protein 1	\	0.658485
Q39688	Epidermis-specific secreted glycoprotein EP1	\	0.742727
A0A1U7ZR80	Ribonucloprotein	\	0.658429
Q84LL7	Salt tolerance protein 6	\	0.785072
A0A2P5B4L8	Ribosomal protein-like protein	\	0.732627
P82277	30S ribosomal protein 2	\	0.796843
A0A067GTM8	Malate dehydrogenase	\	0.625576
A0A2R6QQB7	Subtilisin-like protease	\	1.2636
P05414	Peroxisomal (S)-2-hydroxy-acid oxidase	\	0.743399
B9SZF6	RNA and export factor binding protein	\	0.766101
A0A2I4GDW2	basic blue protein-like	0.431918	\
A0A1R3KSY4	Photosystem II Pbs27	1.35733	\
A0A200Q662	Photosystem I PsaN	2.16194	\
A0A161DY72	DUF642	0.623211	\
A0A0B2PNG0	Heterogeneous nuclear ribonucleoprotein 27C	1.26353	\
Q9ST00	Germin-like protein	0.64962	\
A0A2I4FCE3	U2 small nuclear ribonucleoprotein A'	0.631795	\
A0A1S4BC76	glycine-rich cell wall structural protein-like	0.777749	\
A0A0J8BEJ9	Pectinesterase	0.722736	\
W9RXM8	Aspartic proteinase nepenthesin-2	\	0.764017
A0A061F099	Phosphorylase superfamily protein	\	2.14292
A0A2P6RDN1	Mitochondrial inner membrane translocase subunit Tim17/Tim22/Tim23/peroxisomal protein PMP24	\	0.74382
P82139	50S ribosomal protein L10,	\	0.639559
A0A061DVA9	ATP synthase subunit O	1.23944	\
A0A0K9RFS4	Alpha-galactosidase	0.790628	\
Q9S7L9	Cytochrome c oxidase subunit 6b-1	1.38985	\
Q7XJH8	Auxin-induced beta-glucosidase	0.750452	\
H2BLF5	ATP synthase epsilon chain	1.50105	\
A0A061GHV4	ATP synthase subunit b' isoform 1	1.20617	\
A0A0V0H2N5	Putative 20 kDa chaperonin, chloroplastic-like	\	0.733758
A0A0K9QHH0	ATP-dependent Clp protease proteolytic subunit	\	0.772847
A0A1R3I1L8	Desiccation-related protein PCC3-06-like protein	\	0.692683
A0A2R6Q463	Protein RESTRICTED TEV MOVEMENT like	\	0.657163
A0A1U8IEA9	aspartyl protease family protein 1-like	\	1.97261
Q7X7Z6	OSJNBa0016N04.16 protein	0.775872	\
A0A2I4GYL0	protein trichome birefringence-like 41	0.735583	\
A0A2I4GZE4	coiled-coil domain-containing protein 12	1.37279	\
A0A2U1M6L3	Membrane-associated progesterone binding protein 2	1.29245	\
A0A0B0PBK1	Nesprin-1	0.768388	\
B9R726	Xylem serine proteinase 1,	0.634163	\
Q8VWY2	rRNA N-glycosidase	0.777307	\
A0A251VPB2	Putative SWIB/MDM2 domain-containing protein	0.590051	\
A0A1S3E0D0	protein TAPETUM DETERMINANT 1-like	1.85444	\
A0A2I4DY07	muLtiprotein-bridging factor 1b-like	0.717945	\
A0A1U8KVJ3	probable plastid-lipid-associated protein 4	0.792544	\
A0A2R6PKV4	ACT domain-containing protein	1.33914	\
A0A072UZ59	Ribulose bisphosphate carboxylase/oxygenase activase	\	0.62458
A0A2I0VX12	Peptidyl-prolyl cis-trans isomerase	\	0.639192
A0A1U8BBN4	polyadenylate-binding protein RBP45-like isoform X4	\	0.799384
A0A2P6R6S9	Putative transcription factor interactor and reguLator CCHC(Zn) family	\	0.48326
A0A151TB66	Fasciclin-like arabinogalactan protein 10	\	1.46661
A0A061DHC8	Malate dehydrogenase	\	0.618936
A0A061F263	Thylakoid lumen 18.3 kDa protein	\	1.2081
A0A2N9EW52	V-type proton ATPase subunit G	\	1.34049
A0A177QL77	Fructose-bisphosphate aldolase	\	0.759786
Q42029	Oxygen-evolving enhancer protein 2-1	\	1.24823
H8YU79	RNA binding protein	\	0.734908
